# Supplementary material for: Health Risk Assessment of Heavy Metals in Indoor Household Dust in Urban and Rural Areas of Chiang Mai and Lamphun Provinces, Thailand
Source: MDPI journal article supplement (doi:10.3390/toxics11121018), 2023-12-14
Supplement: s1 [file s1]

## Supplementary Information

### **Health Risk Assessment of Heavy Metals in Indoor Household Dust in Urban and Rural Areas of Chiang Mai and Lamphun Provinces, Thailand**

Kawinwut Somsunun<sup>1,2</sup>, Tippawan Prapamontol<sup>1\*</sup>, Todsabhorn Kuanpun<sup>1</sup>, Teetawat Santijitpakdee<sup>1</sup>, Kanyapak Kohsuwan<sup>1</sup>, Natwasan Jeytawan<sup>1</sup>, Nathaporn Thongjan<sup>1</sup>

<sup>1</sup> Research Institute for Health Sciences (RIHES), Chiang Mai University, Chiang Mai 50200, Thailand

<sup>2</sup> PhD Degree Program in Environmental Science, Environmental Science Research Center, Faculty of Science, Chiang University, Chiang Mai 50200, Thailand

**Table S1** The values of parameters for non-carcinogenic and carcinogenic risk assessment

**Table S2** The reference values for non-carcinogenic and carcinogenic risk assessment

**Table S3** Quality control values of heavy metal measurement

\*Corresponding author

Tippawan Prapamontol

E-mail: tippawan.prapamontol@cmu.ac.th

**Table S1.** The values of parameters for non-carcinogenic and carcinogenic risk assessment

| Abbrev                | Parameter                               | Value    |          | Unit                                       | Ref                             |
|-----------------------|-----------------------------------------|----------|----------|--------------------------------------------|---------------------------------|
|                       |                                         | Adults   | Children |                                            |                                 |
| Non-carcinogenic risk |                                         |          |          |                                            |                                 |
| ABS                   | Absorption factor (dermal)              | 0.001    | 0.001    |                                            | Hou et al., 2019 <sup>1</sup>   |
| AT                    | Averaging time                          | 8760     | 8760     | Days                                       | Doyi et al., 2019 <sup>2</sup>  |
| BW                    | Body weight                             | 70       | 15       | kg                                         |                                 |
| CF                    | Conversion factor                       | 1.00E-06 | 1.00E-06 | mg kg <sup>-1</sup>                        | Isley et al., 2022 <sup>3</sup> |
| ED                    | Exposure duration                       | 24       | 6        | Years                                      | Hou et al., 2019 <sup>1</sup>   |
| EF                    | Exposure frequency                      | 350      | 350      | Days year <sup>-1</sup>                    | US EPA <sup>4</sup>             |
| ET                    | Exposure time                           | 24       | 24       | Hours day <sup>-1</sup>                    | US EPA <sup>4</sup>             |
| IngR                  | Ingestion rate^                         | 100      | 200      | mg day <sup>-1</sup>                       | US EPA, 2011 <sup>5</sup>       |
| InhR                  | Inhalation rate                         | 16.3     | 7.6      | m <sup>3</sup> day <sup>-1</sup>           | Hou et al., 2019 <sup>1</sup>   |
| PEF                   | Soil to air particulate emission factor | 1.36E+09 | 1.36E+09 | m <sup>3</sup> kg <sup>-1</sup>            | US EPA <sup>4</sup>             |
| SA                    | Skin surface area                       | 5700     | 2373     | cm <sup>2</sup>                            | Wang et al., 2022 <sup>6</sup>  |
| SL                    | Solid to skin adherence factor          | 0.07     | 0.2      | mg cm <sup>-2</sup>                        | US EPA <sup>4</sup>             |
| Carcinogenic risk     |                                         |          |          |                                            |                                 |
| 24                    | Hours per day                           | 24       | 24       | hours                                      |                                 |
| ABS                   | Absorption factor (dermal)              | 0.001    | 0.001    |                                            | Hou et al., 2019 <sup>1</sup>   |
| AT                    | Averaging time                          | 365*70   | 365*70   | days                                       | US EPA <sup>4</sup>             |
| CF                    | Conversion factor                       | 1.00E-06 | 1.00E-06 | mg kg <sup>-1</sup>                        | Isley et al., 2022 <sup>3</sup> |
| DFS                   | Age adjusted soil dermal factor         | 362.4    | 362.4    | mg year kg <sup>-1</sup> day <sup>-1</sup> | Doyi et al., 2019 <sup>2</sup>  |
| ED                    | Exposure duration                       | 24       | 6        | years                                      | Hou et al., 2019 <sup>1</sup>   |
| EF                    | Exposure frequency                      | 350      | 350      | Days year <sup>-1</sup>                    | US EPA <sup>4</sup>             |
| ET                    | Exposure time                           | 24       | 24       | Hours day <sup>-1</sup>                    | US EPA <sup>4</sup>             |
| IR                    | Intake rate                             | 113      | 200      | mg year kg <sup>-1</sup> day <sup>-1</sup> | US EPA <sup>7</sup>             |
| LT                    | Lifetime                                | 70       | 70       | years                                      | US EPA <sup>4</sup>             |
| PEF                   | Soil to air particulate emission factor | 1.36E+09 | 1.36E+09 | m <sup>3</sup> kg <sup>-1</sup>            | US EPA <sup>4</sup>             |

**Table S2** The reference values for non-carcinogenic and carcinogenic risk assessment

| Elements | Non-carcinogenic      |                       |                       | Carcinogenic          |                       |                       |
|----------|-----------------------|-----------------------|-----------------------|-----------------------|-----------------------|-----------------------|
|          | RfD <sub>ing</sub>    | RfD <sub>inh</sub>    | RfD <sub>der</sub>    | SF <sub>ing</sub>     | SF <sub>inh</sub>     | SF <sub>der</sub>     |
| As       | 3.00E-04 <sup>a</sup> | 1.50E-05 <sup>a</sup> | 1.23E-04 <sup>b</sup> | 1.50E+00 <sup>a</sup> | 4.30E-03 <sup>a</sup> | 1.50E+00 <sup>a</sup> |
| Cd       | 1.00E-03 <sup>c</sup> | 5.70E-06 <sup>c</sup> | 2.50E-05 <sup>c</sup> | 3.80E-01 <sup>c</sup> | 7.05E+00 <sup>c</sup> | 1.52E+01 <sup>c</sup> |
| Cr       | 3.00E-03 <sup>a</sup> | 1.00E-04 <sup>a</sup> | 6.00E-05 <sup>b</sup> | 5.00E-01 <sup>a</sup> | 4.20E+01 <sup>a</sup> | 5.00E-01 <sup>a</sup> |
| Cu       | 4.00E-02 <sup>c</sup> | 6.90E-04 <sup>b</sup> | 1.20E-02 <sup>b</sup> | -                     | -                     | -                     |
| Mn       | 2.40E-02 <sup>a</sup> | 5.00E-05 <sup>a</sup> | 1.84E-03 <sup>a</sup> | -                     | -                     | -                     |
| Ni       | 2.00E-02 <sup>a</sup> | 2.06E-02 <sup>c</sup> | 5.40E-03 <sup>b</sup> | 1.54E-01 <sup>d</sup> | 2.60E-04 <sup>a</sup> | 9.10E-01 <sup>a</sup> |
| Pb       | 3.50E-03 <sup>b</sup> | 3.52E-03 <sup>c</sup> | 5.25E-04 <sup>b</sup> | 8.50E-03 <sup>e</sup> | 1.20E-05 <sup>d</sup> | 2.10E-01 <sup>a</sup> |
| Zn       | 3.00E-03 <sup>a</sup> | 3.00E-01 <sup>b</sup> | 6.00E-02 <sup>b</sup> | -                     | -                     | -                     |

a: US EPA<sup>4</sup>b: Ferreira-Baptista and De Miguel., 2005<sup>8</sup>c: Doyi et al., 2019<sup>2</sup>d: Wignall et al., 2018<sup>9</sup>e: OEHA<sup>10</sup>

**Table S3** Quality control values of heavy metal measurement

| Metals | LOD<br>(mg kg <sup>-1</sup> ) | Standard<br>recovery<br>± SD (%) | SRM 2584                                             |                        | %R.S.D |
|--------|-------------------------------|----------------------------------|------------------------------------------------------|------------------------|--------|
|        |                               |                                  | Certified<br>mass fraction<br>(mg kg <sup>-1</sup> ) | SRM<br>recovery<br>(%) |        |
| As     | 2.08                          | 83.93 ± 3.29                     | 17.4 ± 4.2                                           | 69.1                   | 8.23   |
| Cd     | 0.39                          | 93.82 ± 3.25                     | 10.0 ± 1.1                                           | 84.7                   | 5.61   |
| Cr     | 1.11                          | 92.86 ± 4.71                     | 135 ± 9.1                                            | 79.7                   | 1.85   |
| Cu     | 0.58                          | 97.58 ± 3.15                     | 320                                                  | 90.1                   | 4.55   |
| Mn     | 0.51                          | 96.98 ± 4.93                     | 370                                                  | 80.1                   | 1.44   |
| Ni     | 1.12                          | 81.88 ± 5.84                     | 90                                                   | 61.5                   | 5.27   |
| Pb     | 0.60                          | 86.83 ± 7.80                     | 9761                                                 | 86.5                   | 1.11   |
| Zn     | 1.54                          | 83.30 ± 5.41                     | 2580 ± 150                                           | 81.1                   | 1.53   |

## References

- Hou, S. *et al.* Pollution characteristics, sources, and health risk assessment of human exposure to Cu, Zn, Cd and Pb pollution in urban street dust across China between 2009 and 2018. *Environment International* **128**, 430-437, doi:<https://doi.org/10.1016/j.envint.2019.04.046> (2019).
- Doyi, I. N. Y., Isley, C. F., Soltani, N. S. & Taylor, M. P. Human exposure and risk associated with trace element concentrations in indoor dust from Australian homes. *Environment International* **133**, 105125, doi:<https://doi.org/10.1016/j.envint.2019.105125> (2019).
- Isley, C. F. *et al.* International Analysis of Sources and Human Health Risk Associated with Trace Metal Contaminants in Residential Indoor Dust. *Environ Sci Technol* **56**, 1053-1068, doi:10.1021/acs.est.1c04494 (2022).
- EPA, U. *US EPA Regional Screening Levels (RSL) Calculator*, <[https://epa-prgs.ornl.gov/cgi-bin/chemicals/csl\\_search](https://epa-prgs.ornl.gov/cgi-bin/chemicals/csl_search)> (
- EPA, U. (U.S. Environmental Protection Agency, Washington, DC, 2011).
- Wang, S., Wang, L., Huan, Y., Wang, R. & Liang, T. Concentrations, spatial distribution, sources and environmental health risks of potentially toxic elements in urban road dust across China. *Science of The Total Environment* **805**, 150266, doi:<https://doi.org/10.1016/j.scitotenv.2021.150266> (2022).
- US EPA. *Supplemental Guidance for Developing Soil Screening Levels for Superfund Sites*, <<https://www.epa.gov/superfund/superfund-soil-screening-guidance>> (
- Ferreira-Baptista, L. & De Miguel, E. Geochemistry and risk assessment of street dust in Luanda, Angola: A tropical urban environment. *Atmospheric Environment* **39**, 4501-4512, doi:<https://doi.org/10.1016/j.atmosenv.2005.03.026> (2005).
- Wignall, J. A. *et al.* Conditional Toxicity Value (CTV) Predictor: An *In Silico* Approach for Generating Quantitative Risk Estimates for Chemicals. *Environmental Health Perspectives* **126**, 057008, doi:doi:10.1289/EHP2998 (2018).
- Office of Environmental Health Hazard Assessment (OEHHA). *Technical Support Document for Cancer Potency Factors 2009*, <<https://oehha.ca.gov/air/cmr/technical-support-document-cancer-potency-factors-2009>> (
